# Supplementary material
Source: publisher site journal article supplement (https://www.spandidos-publications.com/425/downloadSupplementary)

Figure S1. (A) LDHA expression level changes upon FX11 addition (B) changes in lactate secretion upon addition of FX11 in 2D and 3D SW480 (C) 2D and 3D SW480 viability changes upon addition of FX11.

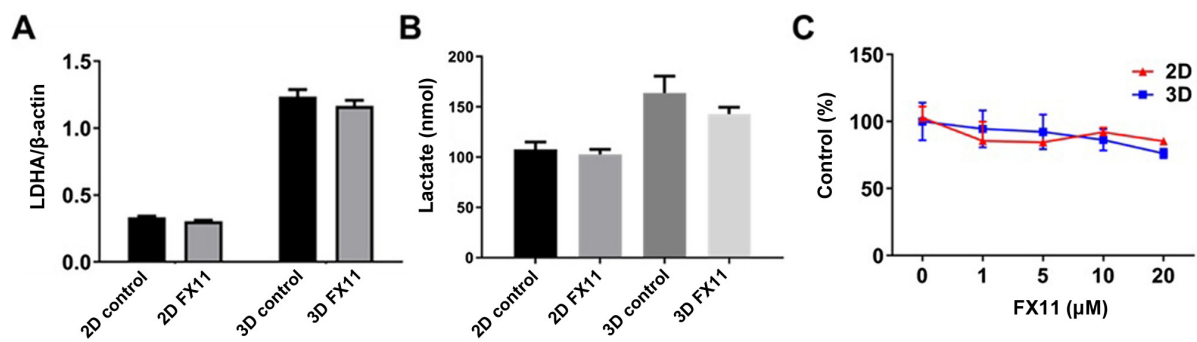

Supplement: Supplementary file 1 [file downloadSupplementary]
